# Supplementary material for: Biodegradability of Dental Care Antimicrobial Agents Chlorhexidine and Octenidine by Ligninolytic Fungi
Source: PubMed Central journal article supplement (PMC7024351; doi:10.3390/molecules25020400), 2020-01-18
Supplement: molecules-25-00400-s001.pdf [file molecules-25-00400-s001.pdf]

# Biodegradation of dental care antimicrobial agents chlorhexidine and octenidine by ligninolytic fungi

Lucie Linhartová <sup>1,2</sup>, Klára Michalíková <sup>1,2</sup>, Kamila Šředlová <sup>1,2</sup> and Tomáš Cajthaml <sup>1,2,\*</sup>

<sup>1</sup> Laboratory of environmental biotechnology, Institute of Microbiology of the Czech Academy of Sciences, Vídeňská 1083, CZ-14220 Prague 4, Czech Republic; lucie.linhartova@biomed.cas.cz (L.L.);

klara.michalikova@biomed.cas.cz (K.M.); kamila.sredlova@biomed.cas.cz (K.Š.)

<sup>2</sup> Faculty of Science, Institute for Environmental Studies, Charles University, Benátská 2, CZ-12801 Prague 2, Czech Republic

\* Correspondence: cajthaml@biomed.cas.cz

## The list of supporting information:

**Table S1:** Activity of manganese-dependent peroxidase (MnP) from *I. lacteus* and laccase (Lac) from *P. ostreatus* during *in vivo* degradation of octenidine (OCT) and chlorhexidine (CHX).

**Table S2:** Activity of manganese-dependent peroxidase (MnP) from *I. lacteus* and laccase (Lac) from *P. ostreatus* during *in vitro* degradation of octenidine (OCT) and chlorhexidine (CHX).

**Figure S1:** Product ion spectra and suggested fragments of (a)  $m/z$  515.2 [M+H]<sup>+</sup> and (b)  $m/z$  258.2 [M+2H]<sup>2+</sup>.

**Figure S2:** (a) mass spectrum of the peak with  $R_t = 5.9$  min,  $m/z$  439.4 [M+H]<sup>+</sup> (b) product ion spectra and suggested fragments of  $m/z$  439.4 [M+H]<sup>+</sup>.

**Figure S3:** Product ion spectra and suggested fragments of (a)  $m/z$  567.5 [M+H]<sup>+</sup> and (b)  $m/z$  284.3 [M+2H]<sup>2+</sup>.

**Figure S4:** (a) mass spectrum of the peak with  $R_t = 7.1$  min,  $m/z$  283.2 [M+H]<sup>+</sup> (b) product ion spectra and suggested fragments of  $m/z$  565.5 [M+H]<sup>+</sup>.

**Figure S5:** Product ion spectra and suggested fragments of (a)  $m/z$  565.5 [M+H]<sup>+</sup> and (b)  $m/z$  283.3 [M+2H]<sup>2+</sup>.

**Table S1.** Activity of manganese-dependent peroxidase (MnP) from *I. lacteus* and laccase (Lac) from *P. ostreatus* during *in vivo* degradation of octenidine (OCT) and chlorhexidine (CHX).

| Degradation<br>Time | OCT       |            | CHX       |            |
|---------------------|-----------|------------|-----------|------------|
|                     | MnP (U/l) | Lac (U/l)  | MnP (U/l) | Lac (U/l)  |
| 0 d                 | 3.6 ± 0.4 | 31.5 ± 0.5 | 4.6 ± 0.5 | 33 ± 4     |
| 3 d                 | 3.0 ± 0.4 | 17.2 ± 0.5 | 6.2 ± 0.5 | 15 ± 3     |
| 7 d                 | 1.5 ± 0.5 | 14.1 ± 0.1 | 5.7 ± 0.3 | 14.1 ± 0.7 |
| 14 d                | 2.5 ± 0.9 | 10.8 ± 0.1 | 6.3 ± 0.5 | 9.1 ± 0.4  |
| 21 d                | 2.5 ± 0.5 | 1.8 ± 0    | 4 ± 1     | 5.1 ± 0.1  |

Data are means ± SD (n=3).

**Table S2.** Activity of manganese-dependent peroxidase (MnP) from *I. lacteus* and laccase (Lac) from *P. ostreatus* during *in vitro* degradation of octenidine (OCT) and chlorhexidine (CHX).

| Degradation<br>Time | OCT       |           | CHX       |           |
|---------------------|-----------|-----------|-----------|-----------|
|                     | MnP (U/l) | Lac (U/l) | MnP (U/l) | Lac (U/l) |
| 0 h                 | 60 ± 1    | 120 ± 2   | 60 ± 2    | 120 ± 7   |
| 2 h                 | 58 ± 2    | 119 ± 3   | 59 ± 4    | 118 ± 5   |
| 4 h                 | 57 ± 2    | 118 ± 8   | 57 ± 5    | 116 ± 5   |
| 8 h                 | 58 ± 2    | 105 ± 12  | 57 ± 3    | 110 ± 8   |
| 24 h                | 58 ± 8    | 79 ± 1    | 56 ± 5    | 86 ± 7    |
| 48 h                | 52 ± 4    | 55 ± 2    | 54 ± 3    | 62 ± 3    |
| 96 h                | 30 ± 5    | 47 ± 1    | 32 ± 7    | 42 ± 5    |
| 192 h               | 17 ± 2    | 33 ± 0    | 21 ± 4    | 31 ± 4    |

Data are means ± SD (n=3).

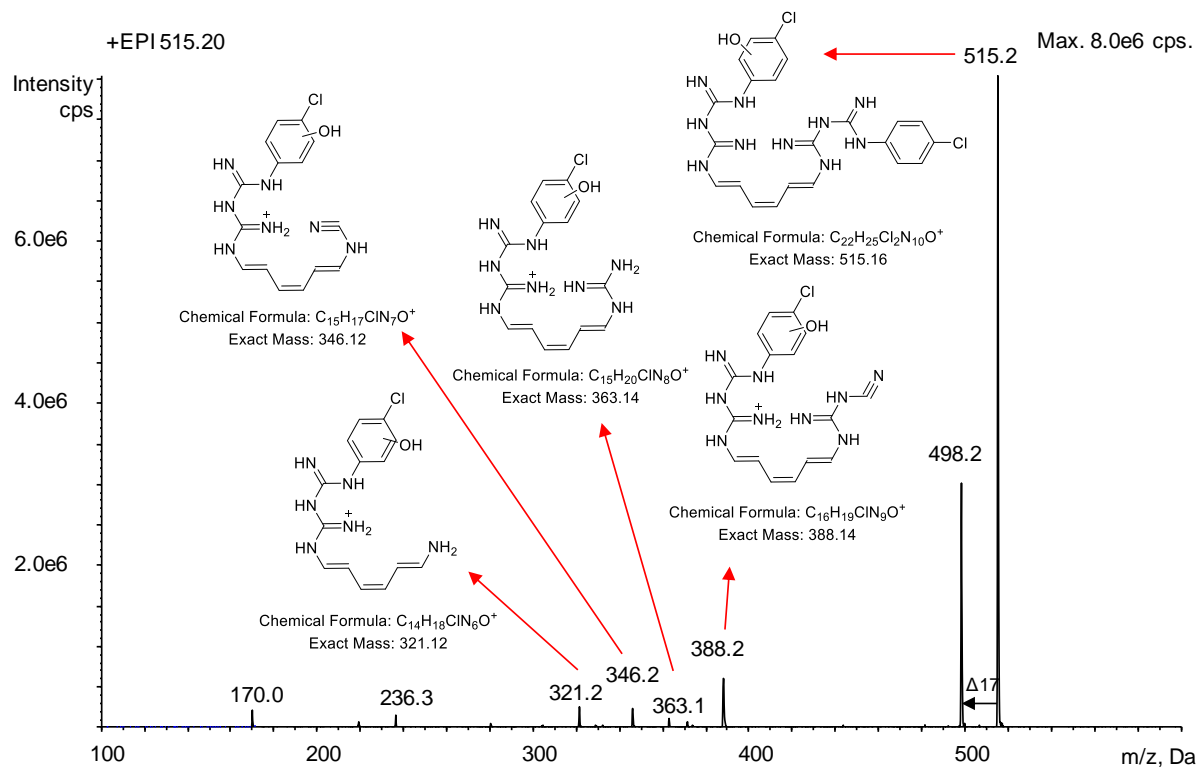

(a)

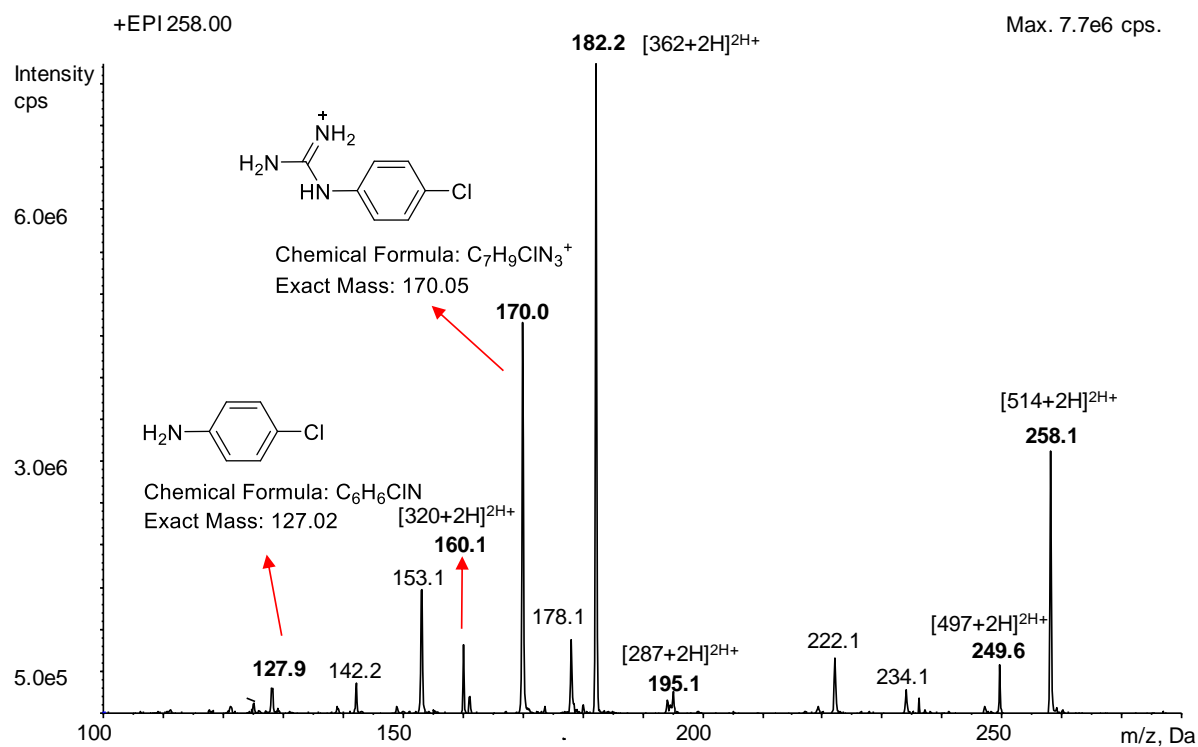

(b)

**Figure S1:** Product ion spectra and suggested fragments of (a)  $m/z$  515.2  $[M+H]^+$  and (b)  $m/z$  258.2  $[M+2H]^{2+}$ .

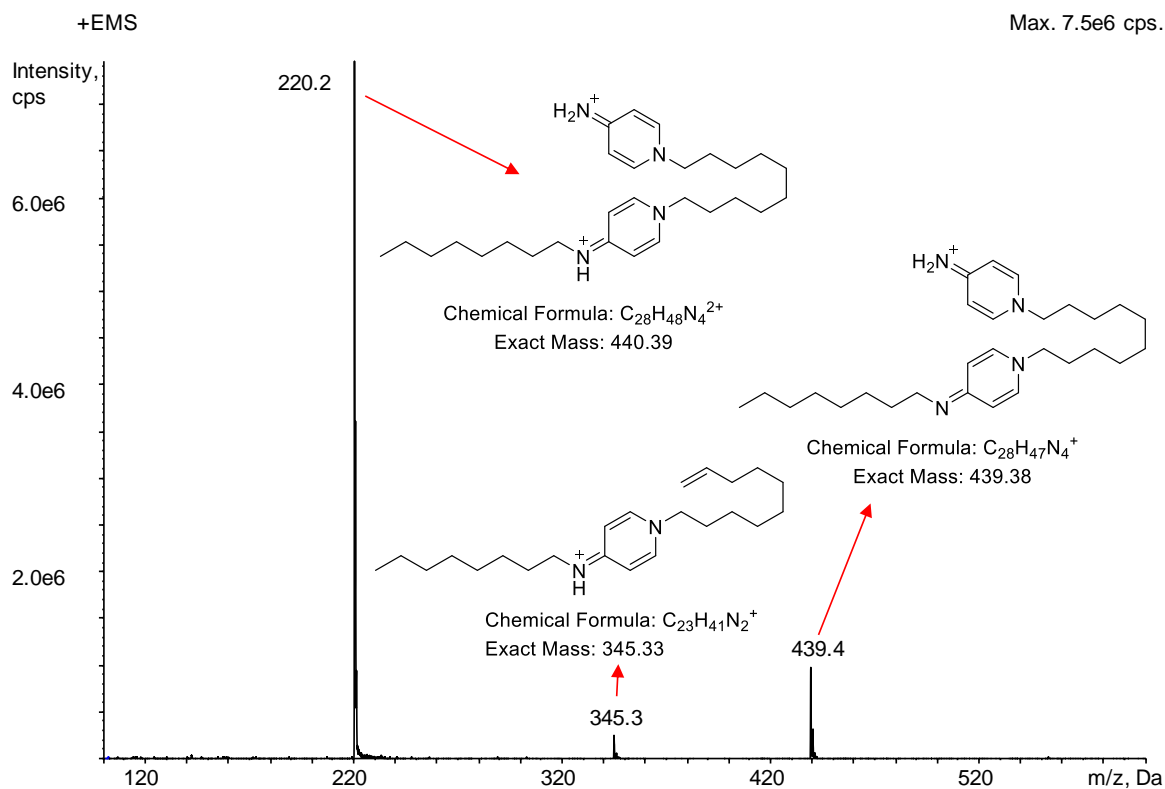

(a)

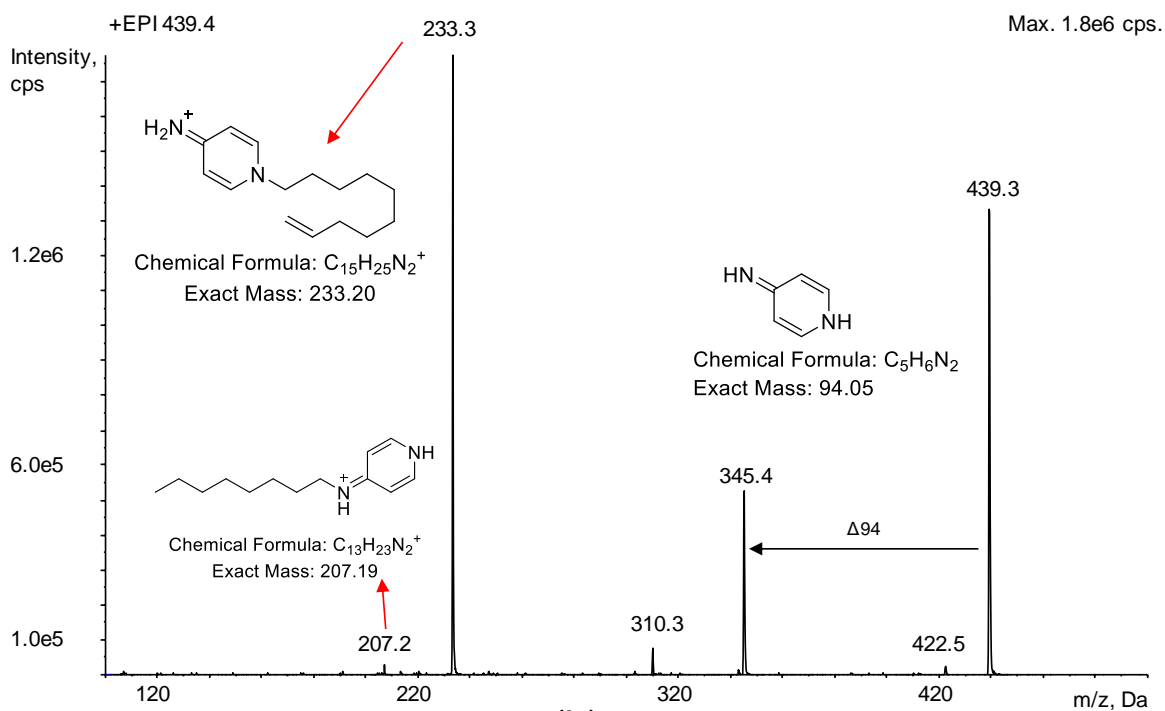

(b)

**Figure S2:** (a) mass spectrum of the peak with  $R_t = 5.9$  min,  $m/z$  439.4  $[M+H]^+$  (b) product ion spectra and suggested fragments of  $m/z$  439.4  $[M+H]^+$ .

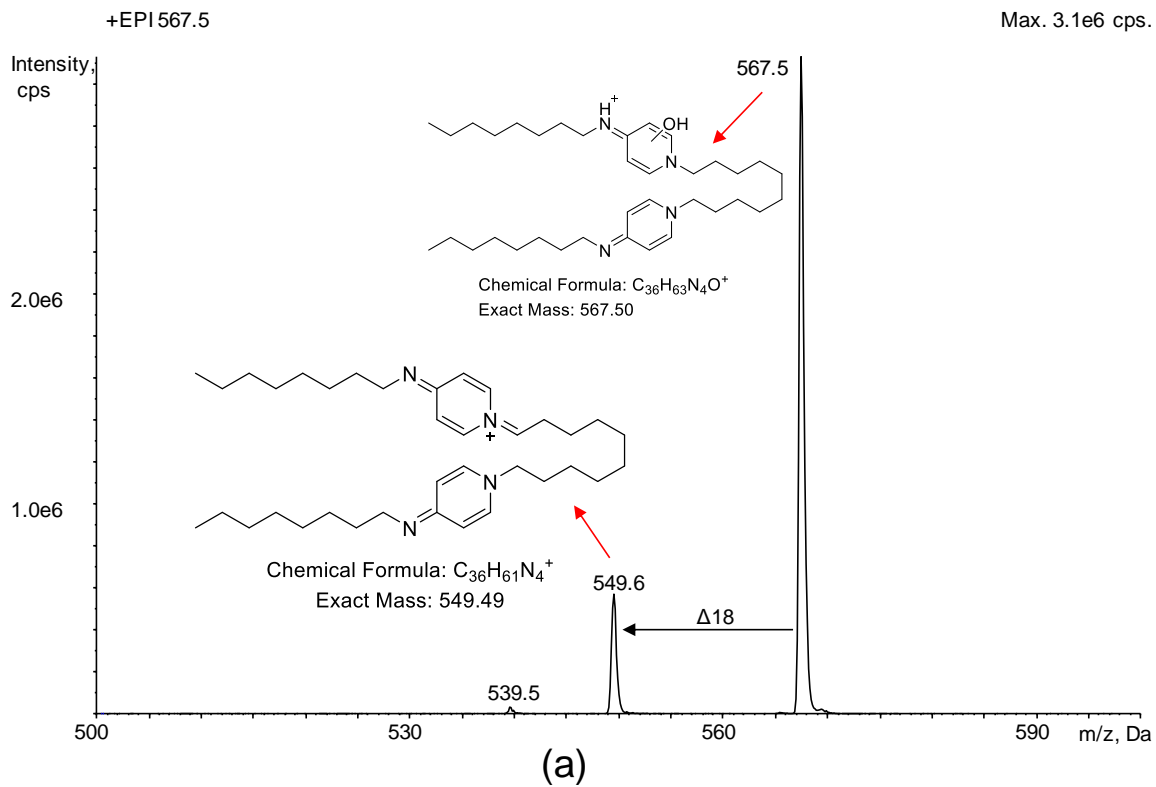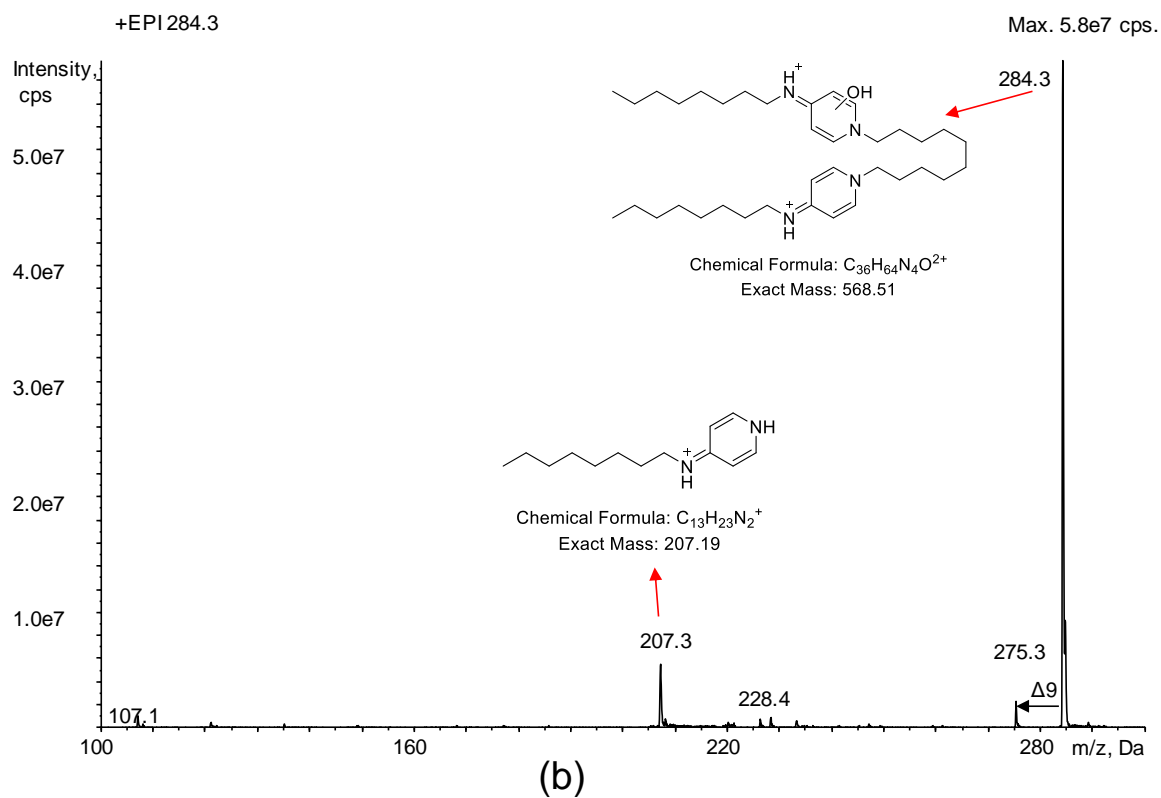

**Figure S3:** Product ion spectra and suggested fragments of (a)  $m/z$  567.5  $[M+H]^+$  and (b)  $m/z$  284.3  $[M+2H]^{2+}$ .

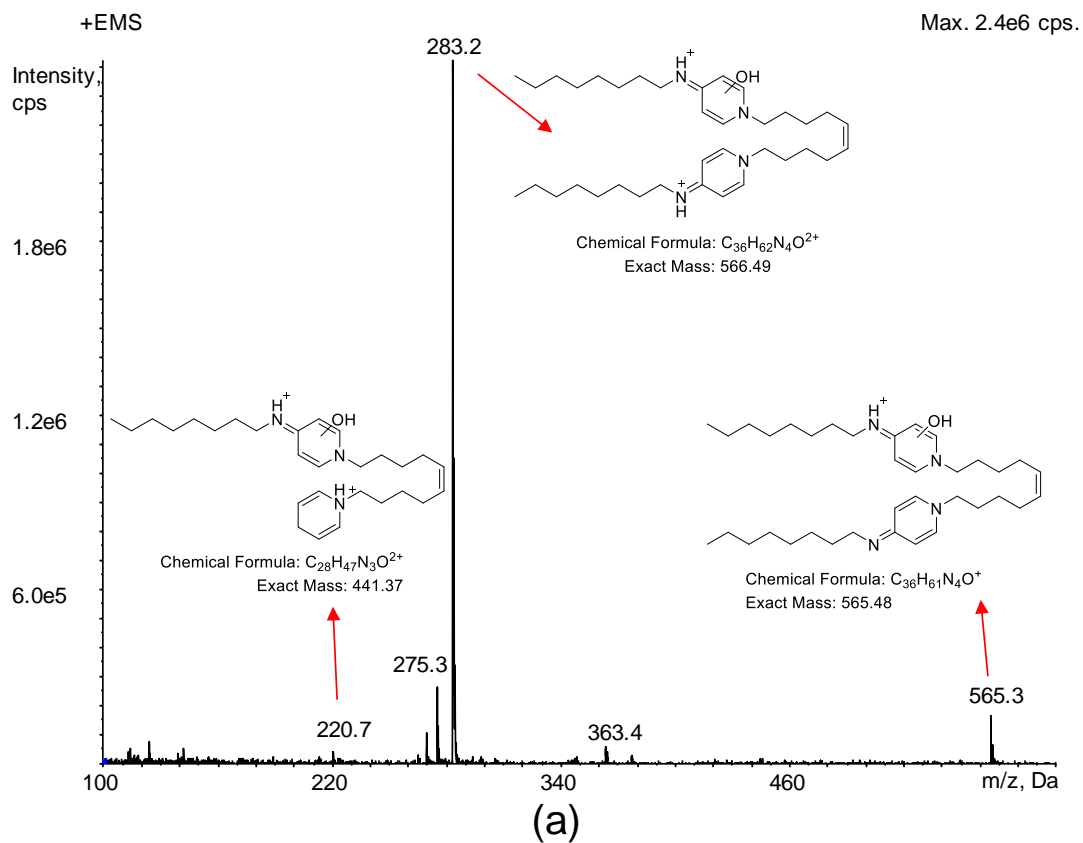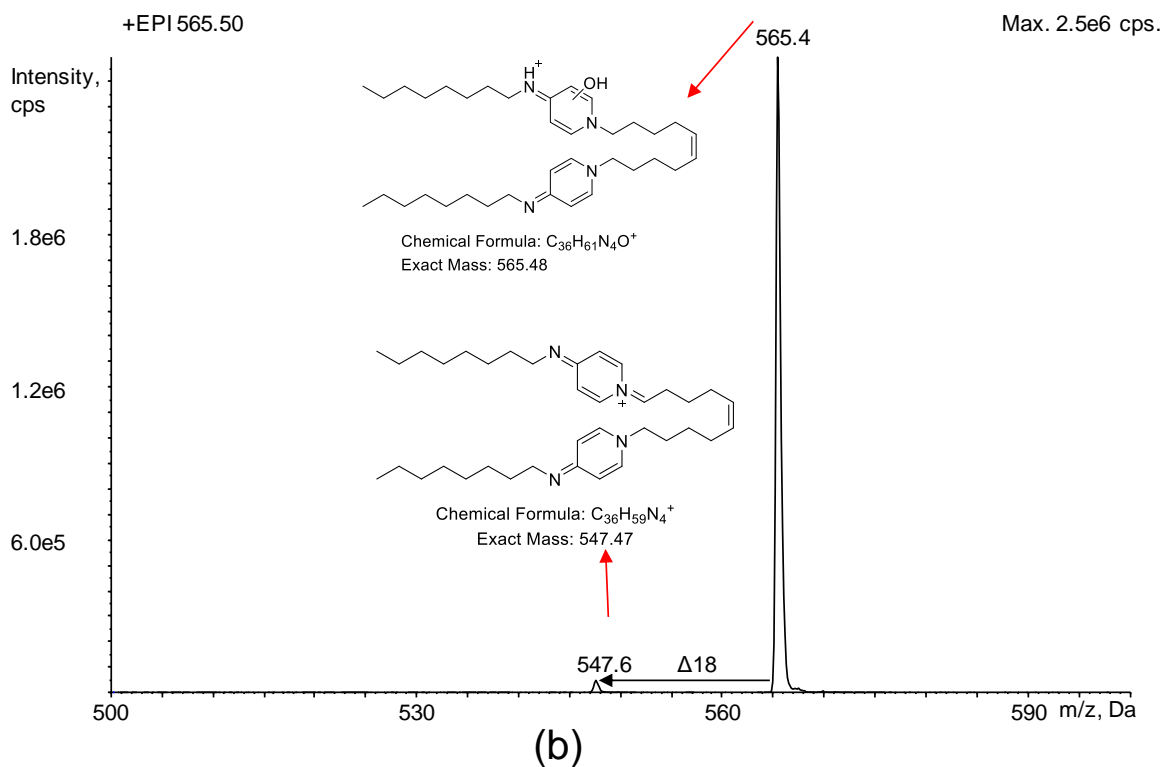

**Figure S4:** (a) mass spectrum of the peak with  $R_t = 7.1$  min,  $m/z$  283.2  $[M+H]^+$  (b) product ion spectra and suggested fragments of  $m/z$  565.5  $[M+H]^+$ .

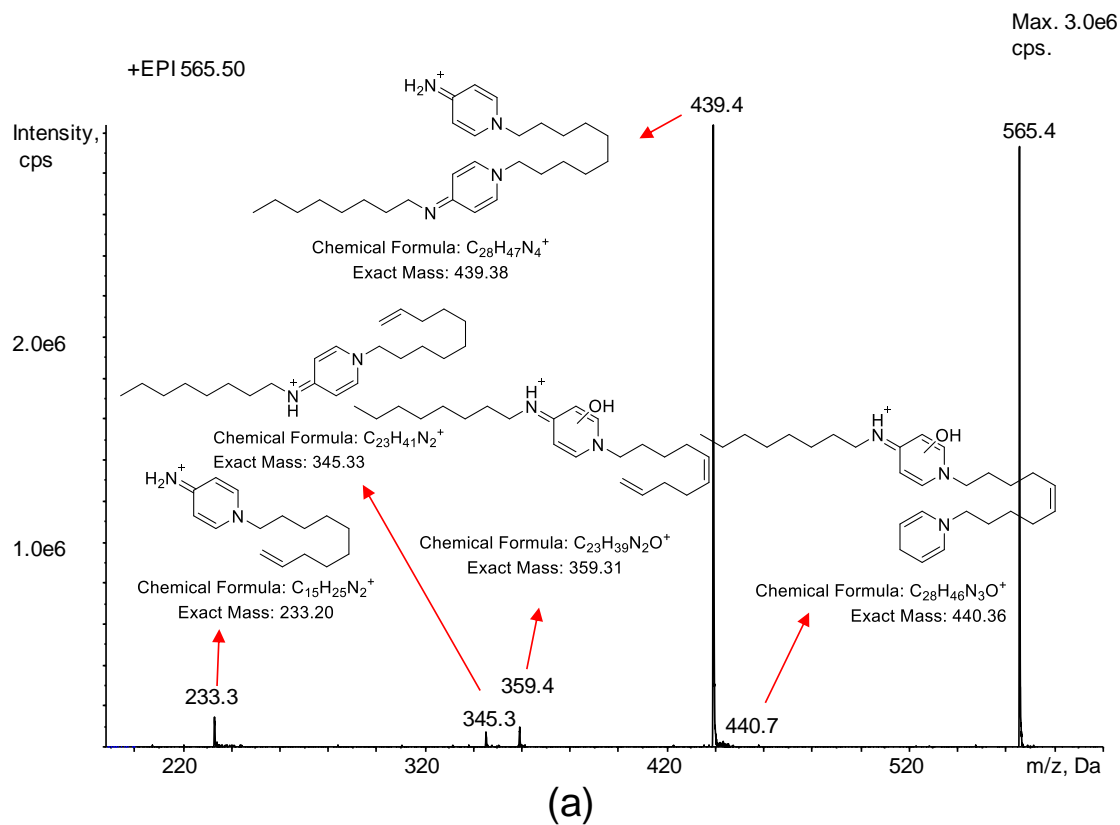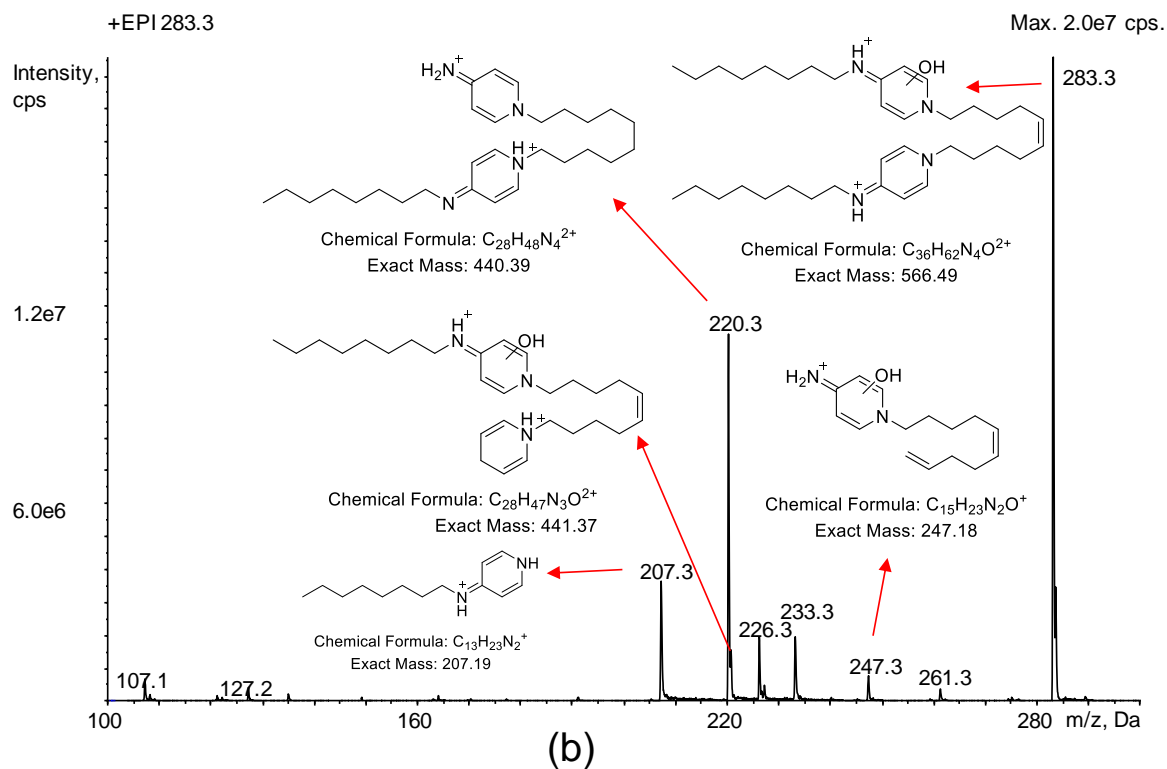

**Figure S5:** Product ion spectra and suggested fragments of (a)  $m/z$  565.5  $[M+H]^+$  and (b)  $m/z$  283.3  $[M+2H]^{2+}$ .
